# Supplementary material for: Understanding the effect of liquid crystal content on the phase behavior and mechanical properties of liquid crystal elastomers
Source: Royal Society of Chemistry journal article supplement (doi:10.1039/d2sm00480a), 2022-01-01
Supplement: d2sm00480a1.pdf [file d2sm00480a1.pdf]

## Supporting Information

### Understanding the effect of liquid crystal content on the phase behavior and mechanical properties of liquid crystal elastomers

Morgan Barnes<sup>a</sup>, Sueda Cetinkaya<sup>b</sup>, Alec Ajsztajn<sup>a</sup>, and Rafael Verduzco<sup>ab</sup>

<sup>a</sup>Department of Materials Science and NanoEngineering, Rice University, Houston, TX 77005, USA

<sup>b</sup>Department of Chemical and Biomolecular Engineering, Rice University, Houston, TX 77005, USA

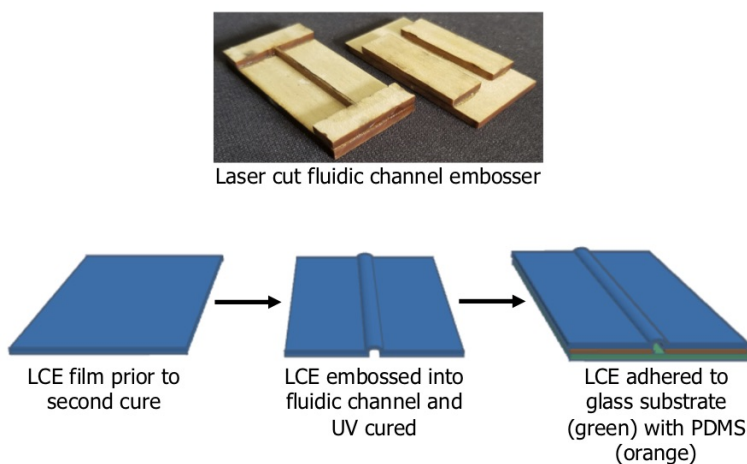

**Figure S1** **TOP** Photograph of laser-cut and assemble fluidic channel embosser. **Bottom** Schematic of LCE fluidic channel synthesis. First, a flat LCE film is synthesized which is embossed into a fluidic channel and UV cured to program the shape change. The LCE is then adhered to glass using PDMS. The channel collapses and raises when heated and cooled, respectively.

|                                        | RM257<br>mg<br>[mmol] | EDDET<br>mg<br>[mmol] | PETMP<br>mg<br>[mmol] | TEGDA<br>mg<br>[mmol] | HHMP<br>mg | DPA 2 wt%<br>in CHCl <sub>3</sub><br>mg | CHCl <sub>3</sub><br>mg | mass %<br>RM257 |
|----------------------------------------|-----------------------|-----------------------|-----------------------|-----------------------|------------|-----------------------------------------|-------------------------|-----------------|
| <b>0 mol% acrylate<br/>from TEGDA</b>  | 588<br>[1]            | 124.09<br>[0.68]      | 55.45<br>[0.1126]     | 0<br>[0]              | 2.94       | 181.34                                  | 235.2                   | 76.6%           |
| <b>5 mol% acrylate<br/>from TEGDA</b>  | 588<br>[1]            | 130.62<br>[0.71]      | 58.37<br>[0.1196]     | 15.91<br>[0.05]       | 3.02       | 190.88                                  | 235.2                   | 74.15%          |
| <b>10 mol% acrylate<br/>from TEGDA</b> | 588<br>[1]            | 137.87<br>[0.75]      | 61.62<br>[0.1262]     | 33.58<br>[0.1]        | 3.11       | 201.49                                  | 235.2                   | 71.61%          |
| <b>15 mol% acrylate<br/>from TEGDA</b> | 588<br>[1]            | 145.99<br>[0.80]      | 65.24<br>[0.1337]     | 53.35<br>[0.15]       | 3.26       | 213.34                                  | 235.2                   | 68.69%          |
| <b>20 mol% acrylate<br/>from TEGDA</b> | 588<br>[1]            | 155.11<br>[0.85]      | 69.32<br>[0.1420]     | 75.58<br>[0.20]       | 3.32       | 226.68                                  | 235.2                   | 66.21%          |

**Table S1** Table of reagent amounts used to synthesize TEGDA LCEs.

|                                    | RM257<br>mg<br>[mmol] | EDDET<br>mg<br>[mmol] | PETMP<br>mg<br>[mmol] | LiTFSI<br>mg<br>[mmol] | HHMP<br>mg | TEA  | CHCl <sub>3</sub><br>mg | mass %<br>RM257 |
|------------------------------------|-----------------------|-----------------------|-----------------------|------------------------|------------|------|-------------------------|-----------------|
| <b>0 mol% Li<sup>+</sup>/EO</b>    | 588<br>[1]            | 124.09<br>[0.68]      | 55.45<br>[0.1126]     | 0                      | 2.94       | 3.62 | 705.6                   | 76.6%           |
| <b>5 mol% Li<sup>+</sup>/EO</b>    | 588<br>[1]            | 124.09<br>[0.68]      | 55.45<br>[0.1126]     | 19.52<br>[0.068]       | 2.94       | 3.62 | 705.6                   | 74.70%          |
| <b>7.5 mol% Li<sup>+</sup>/EO</b>  | 588<br>[1]            | 124.09<br>[0.68]      | 55.45<br>[0.1126]     | 29.28<br>[0.102]       | 2.94       | 3.62 | 705.6                   | 73.79%          |
| <b>10 mol% Li<sup>+</sup>/EO</b>   | 588<br>[1]            | 124.09<br>[0.68]      | 55.45<br>[0.1126]     | 39.04<br>[0.136]       | 2.94       | 3.62 | 705.6                   | 72.90%          |
| <b>12.5 mol% Li<sup>+</sup>/EO</b> | 588<br>[1]            | 124.09<br>[0.68]      | 55.45<br>[0.1126]     | 48.80<br>[0.170]       | 2.94       | 3.62 | 705.6                   | 72.02%          |
| <b>17.5 mol% Li<sup>+</sup>/EO</b> | 588<br>[1]            | 124.09<br>[0.68]      | 55.45<br>[0.1126]     | 68.32<br>[0.238]       | 2.94       | 3.62 | 705.6                   | 70.35%          |
| <b>22.5 mol% Li<sup>+</sup>/EO</b> | 588<br>[1]            | 124.09<br>[0.68]      | 55.45<br>[0.1126]     | 87.85<br>[0.306]       | 2.94       | 3.62 | 705.6                   | 68.74%          |
| <b>27.5 mol% Li<sup>+</sup>/EO</b> | 588<br>[1]            | 124.09<br>[0.68]      | 55.45<br>[0.1126]     | 107.37<br>[0.374]      | 2.94       | 3.62 | 705.6                   | 67.20%          |

**Table S2** Table of reagent amounts used to synthesize lithiated LCEs

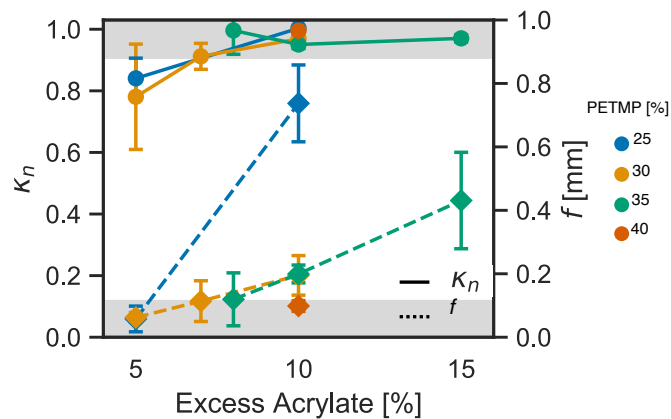

**Figure S2** Optimization of the normalized curvature and flatness of an LCE with 10 mol % TEGDA.

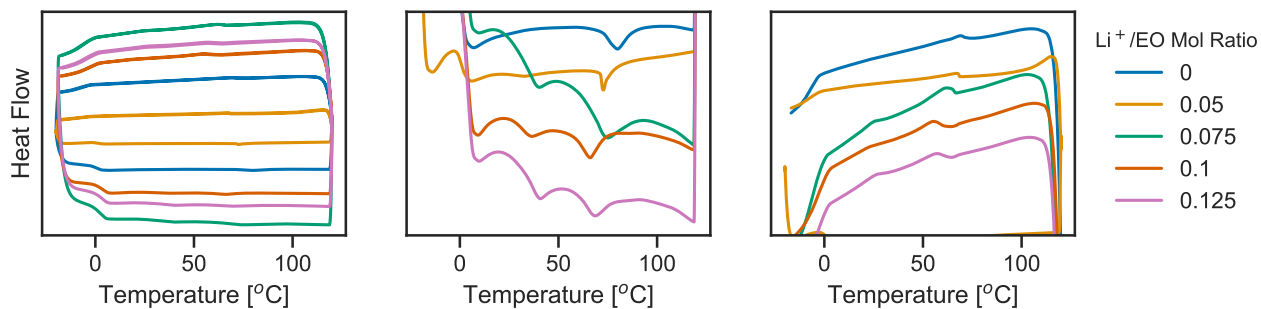

**Figure S3** DSC curves of LCEs with increasing amounts of lithiation. The middle plot curve is a zoomed in region of the heating trace, and left plot is a zoomed in region of the cooling trace.
